# Supplementary material for: A flexible three-dimensional composite nanofiber enhanced quasi-solid electrolyte for high-performance lithium metal batteries
Source: Royal Society of Chemistry journal article supplement (doi:10.1039/d0qi01159b), 2020-11-03
Supplement: d0qi01159b1.pdf [file d0qi01159b1.pdf]

## Supplementary Information

### **A flexible three-dimensional composite nanofiber enhanced quasi-solid electrolyte for high-performance lithium metal batteries**

Shuyuan Li<sup>1</sup>, Nianwu Li,<sup>2</sup> Chunwen Sun<sup>1,2,3\*</sup>

<sup>1</sup> School of Chemistry and Chemical Engineering, Guangxi University, Nanning, Guangxi 530004, P. R. China.

<sup>2</sup> CAS Center for Excellence in Nanoscience, Beijing Institute of Nanoenergy and Nanosystems, Chinese Academy of Sciences, Beijing 100083, P. R. China.

<sup>3</sup> School of Nanoscience and Technology, University of Chinese Academy of Sciences, Beijing, 100049, China.

\*Email: [sunchunwen@binn.cas.cn](mailto:sunchunwen@binn.cas.cn)

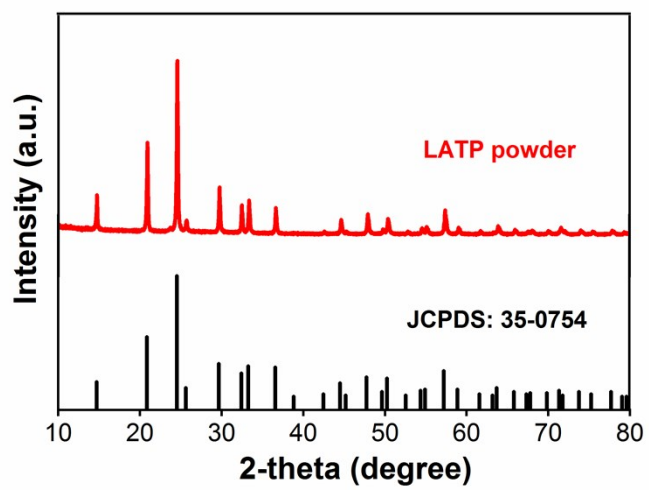

**Fig. S1** LATP particles prepared by sol-gel method and milled for 12h

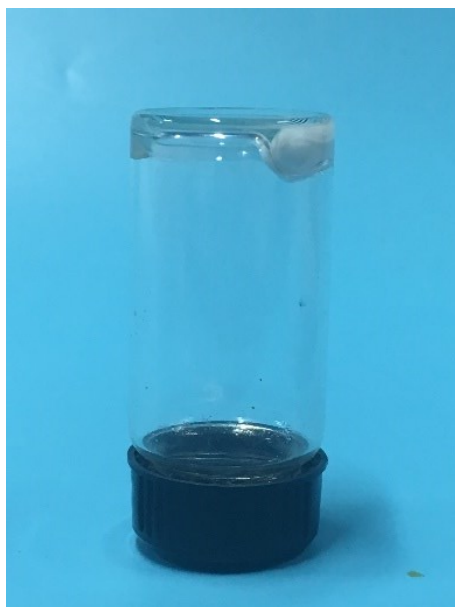

**Fig. S2** Photo of the formed gel.

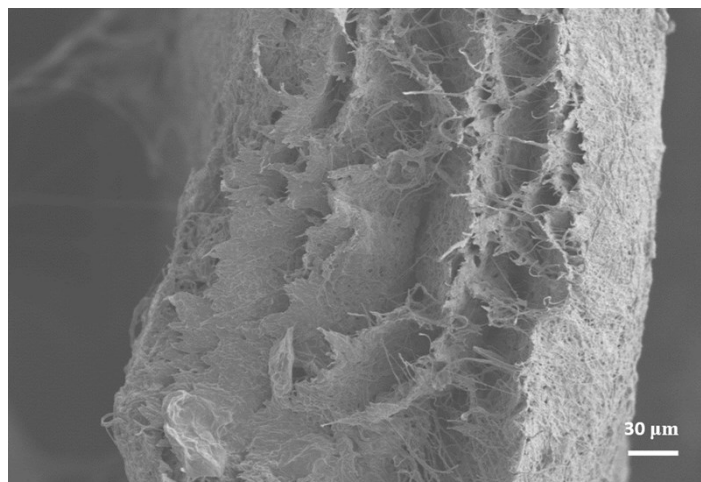

**Fig. S3** The cross-sectional SEM images of the CGE.

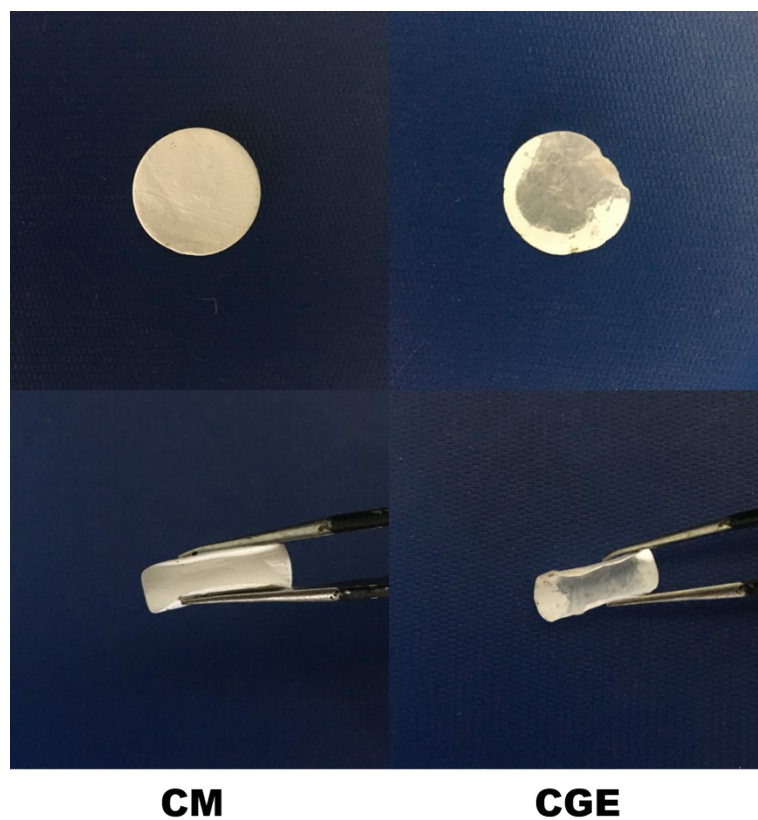

**Fig. S4** Photos of the flexible composite membrane and the CGE.

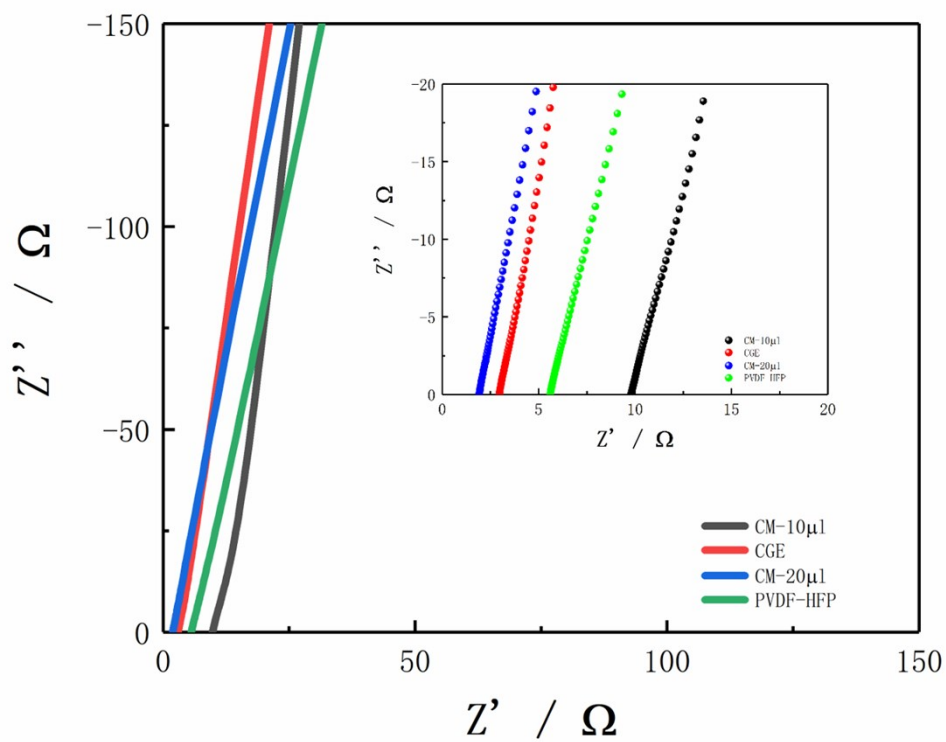

**Fig. S5** EIS spectra of the CGE, the PVDF-HFP film with gel, and the composite membrane of LATP/PVDF-HFP (CM) with various gel contents on each side.

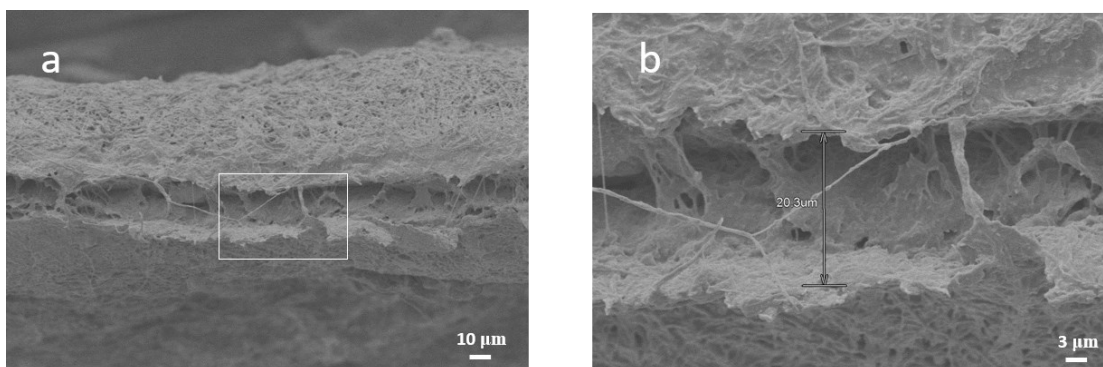

**Fig. S6** SEM images of (a) Cross-sectional view of the CGE and (b) The magnified SEM image of marked area in (a).

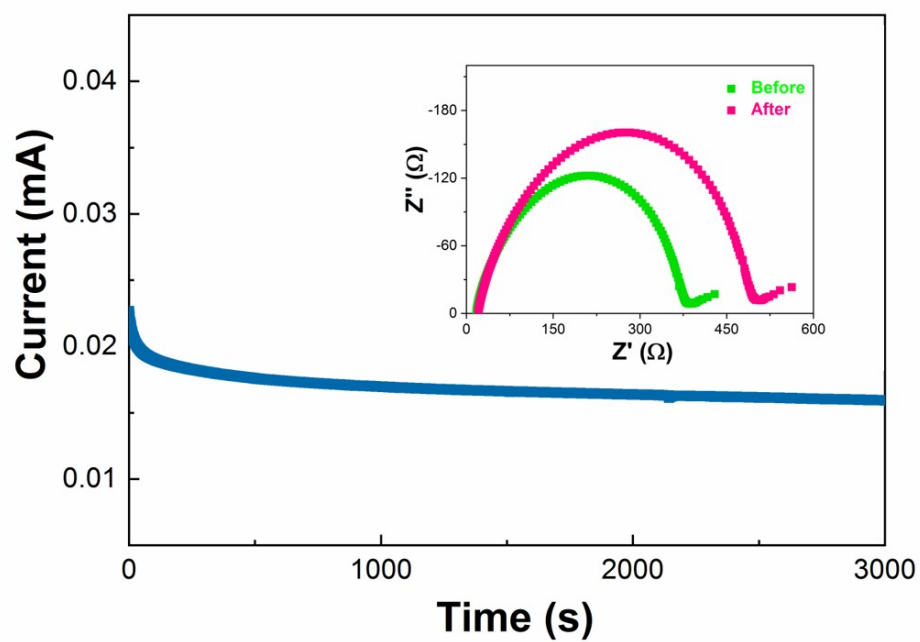

**Fig. S7** Lithium ion transference number ( $t_{Li^+}$ ) of the composite membrane without adding LATP particle.



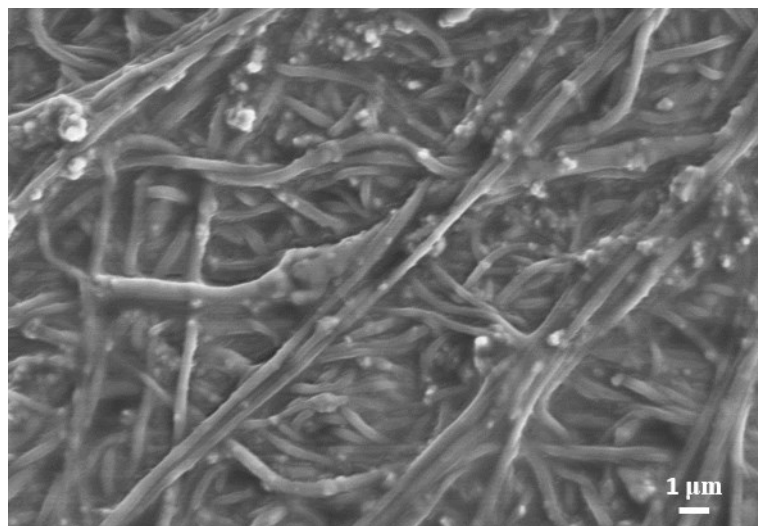

**Fig. S8** SEM images of the surface of the CGE after charge and discharge cycles at 0.5 C rate for 300 cycles.

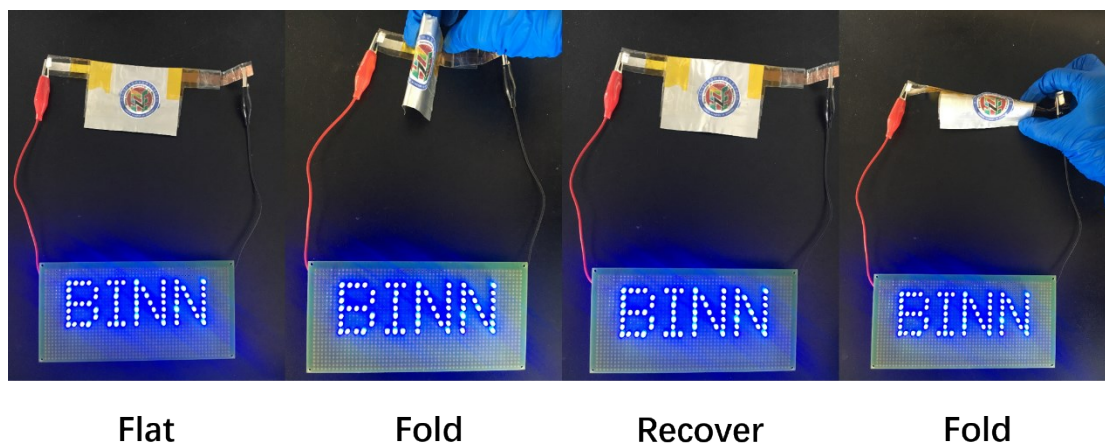

**Fig. S9** Photos of the pouch battery under different states.
